# Supplementary material
Source: MDPI journal article supplement (https://www.mdpi.com/2504-5377/6/4/68)
Supplement: s1 [file s1]

# Direct Resolution of the Interactions of a Hydrocarbon Gas with Adsorbed Surfactant Monolayers at the Water/Air Interface Using Neutron Reflectometry

Richard A. Campbell <sup>1,2,\*</sup>, Talmira Kairaliyeva <sup>3</sup>, Svetlana Santer <sup>3</sup>, Emanuel Schneck <sup>4</sup> and Reinhard Miller <sup>4,\*</sup>

<sup>1</sup> Institut Laue-Langevin, 71 avenue des Martyrs, Cedex 09, 38042 Grenoble, France

<sup>2</sup> Division of Pharmacy and Optometry, University of Manchester, Manchester, M13 9PT, UK

<sup>3</sup> Institute for Physics and Astronomy, University of Potsdam, 14476 Potsdam, Germany

<sup>4</sup> Physics Department, Technical University Darmstadt, 64289 Darmstadt, Germany

\* Correspondence: richard.campbell@manchester.ac.uk (R.A.C.); miller@fkp.tu-darmstadt.de (R.M.)

## Supporting Information

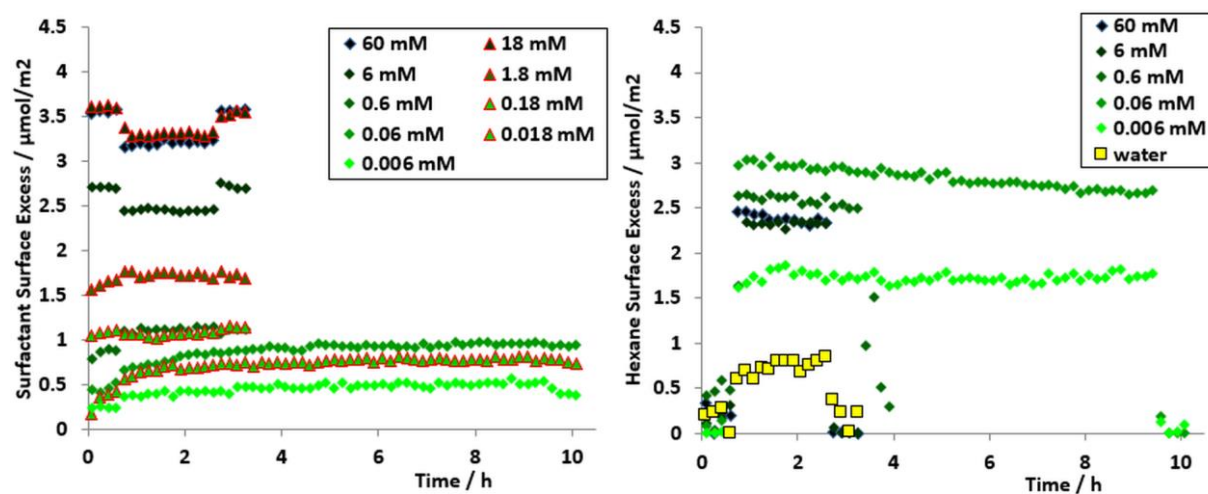

Figure S1. Full dataset for C<sub>12</sub>TAB: (left) surfactant and (right) hexane surface excesses.

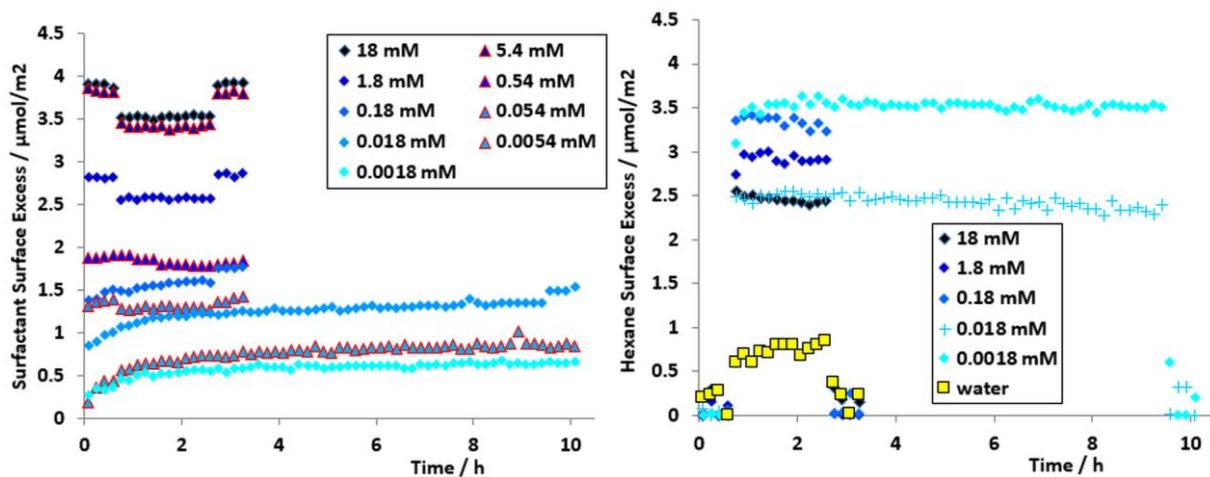

Figure S2. Full dataset for  $C_{14}TAB$ : (left) surfactant and (right) hexane surface excesses.

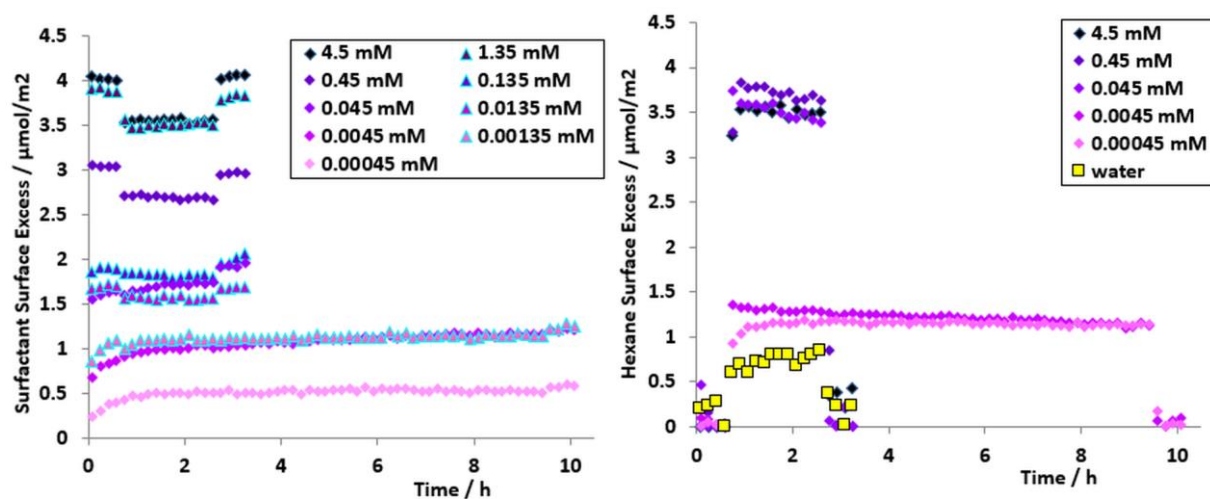

Figure S3. Full dataset for  $C_{16}TAB$ : (left) surfactant and (right) hexane surface excesses.

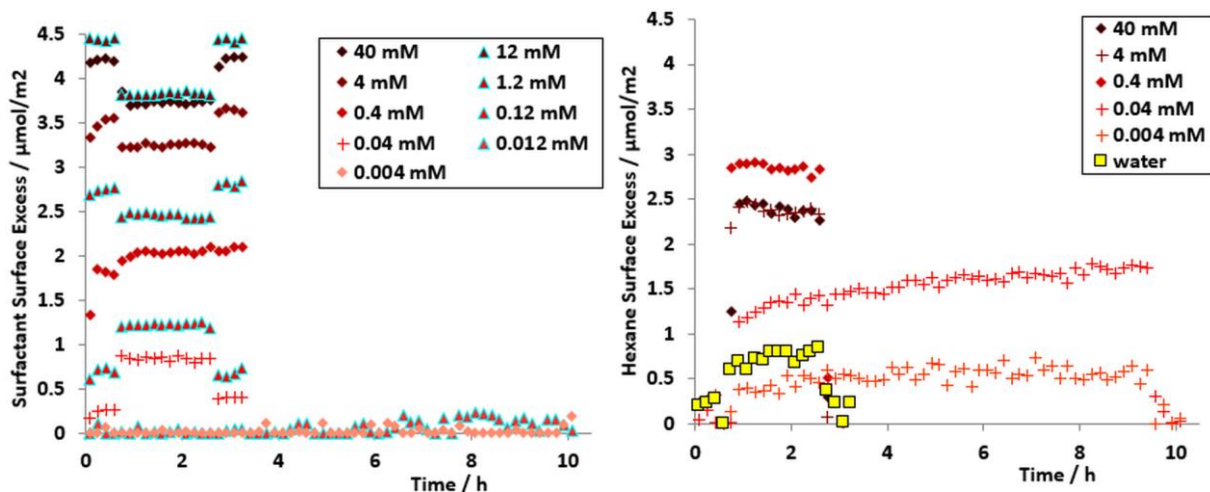

Figure S4. Full dataset for SDS: (left) surfactant and (right) hexane surface excesses.
